# Supplementary material
Source: MDPI journal article supplement (https://www.mdpi.com/2071-1050/13/14/7685)
Supplement: s1 [file s1]

## Supplementary Information

# Comparison Study of Metal Oxides ( $\text{CeO}_2$ , $\text{CuO}$ , $\text{SnO}_2$ , $\text{CdO}$ , $\text{ZnO}$ and $\text{TiO}_2$ ) decked Few Layered Graphene Nanocomposites for Dye-Sensitized Solar Cells

Satish Bykkam<sup>1</sup>, D.N. Prasad<sup>1</sup>, Muni Raj Maurya<sup>1,2</sup>, Kishor Kumar Sadasivuni<sup>1\*</sup> and John-John Cabibihan<sup>2</sup>

<sup>1</sup> Center for Advanced Materials, Qatar University, P.O. Box. 2713, Doha, Qatar; bykkam.satish@qu.edu.qa (S.B.); dn.prasad@qu.edu.qa (D.N.P.); muni.raj@qu.edu.qa (M.R.M.)

<sup>2</sup> Department of Mechanical and Industrial Engineering, College of Engineering, Qatar University, P.O. Box. 2713, Doha, Qatar; john.cabibihan@qu.edu.qa

\*Correspondence: kishorkumars@qu.edu.qa

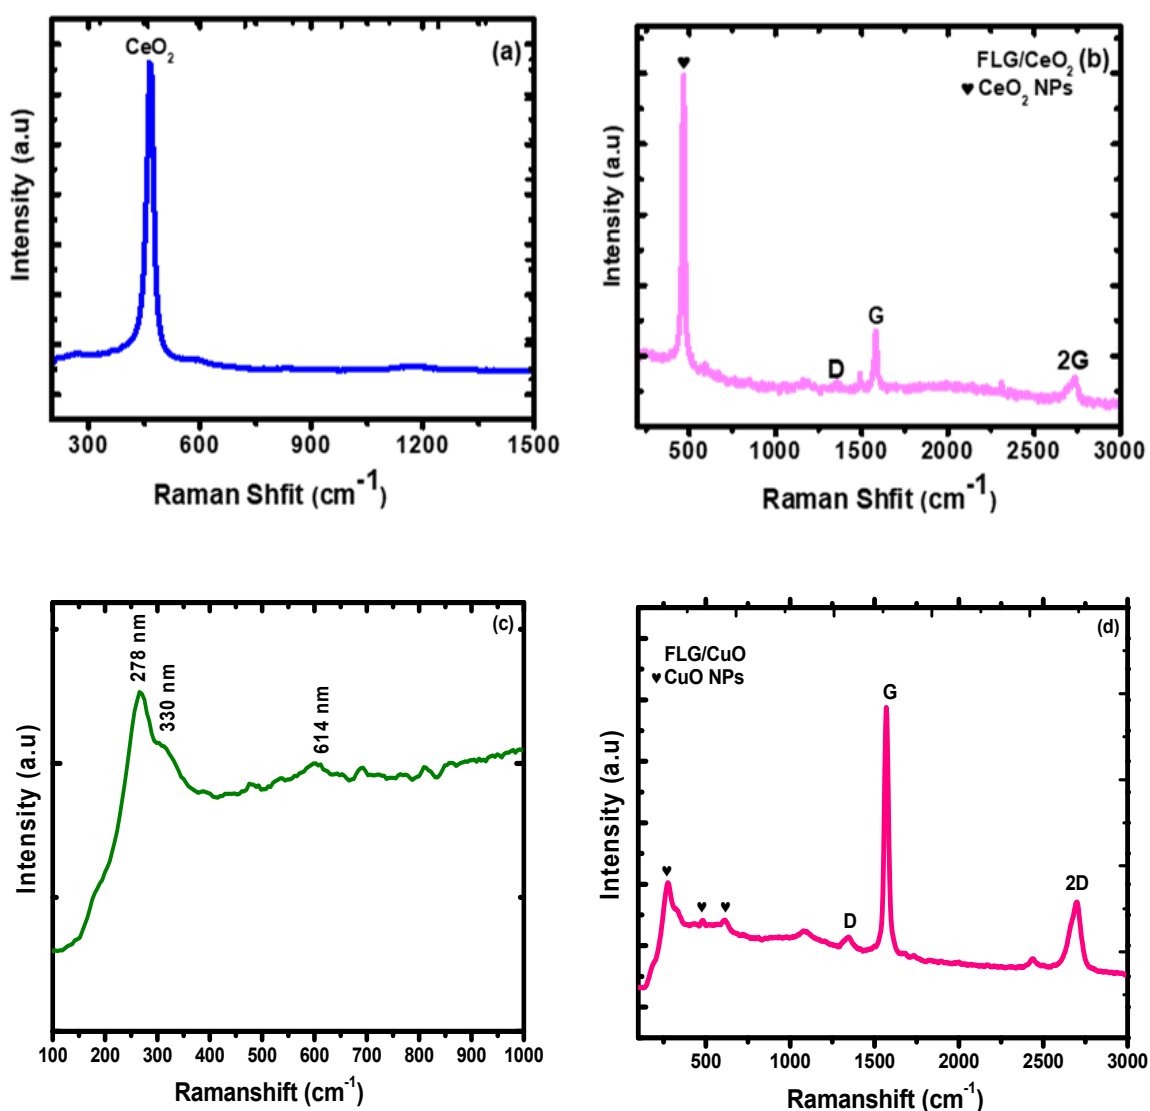

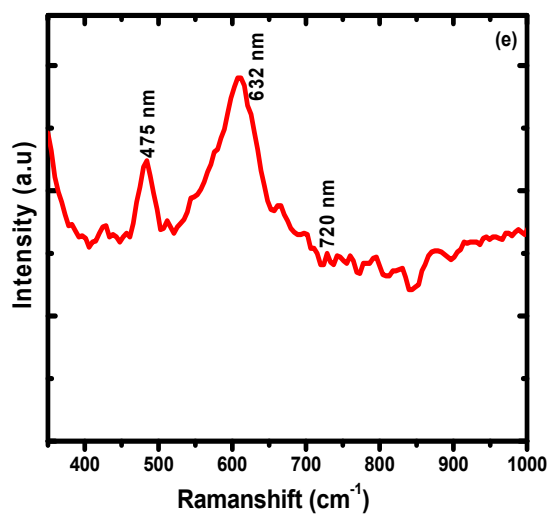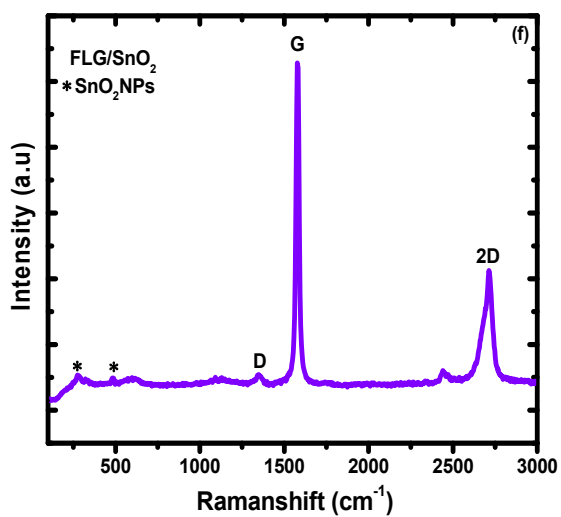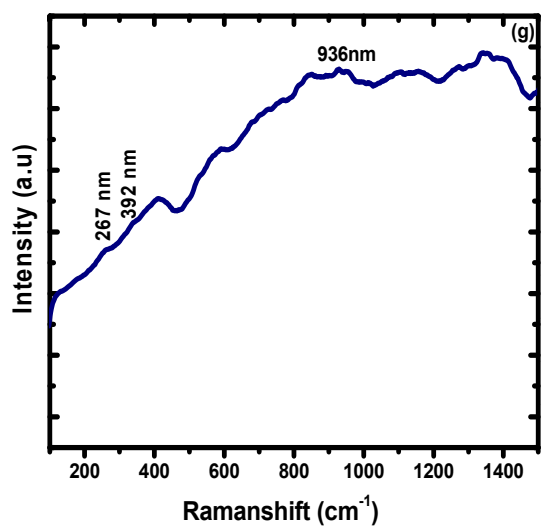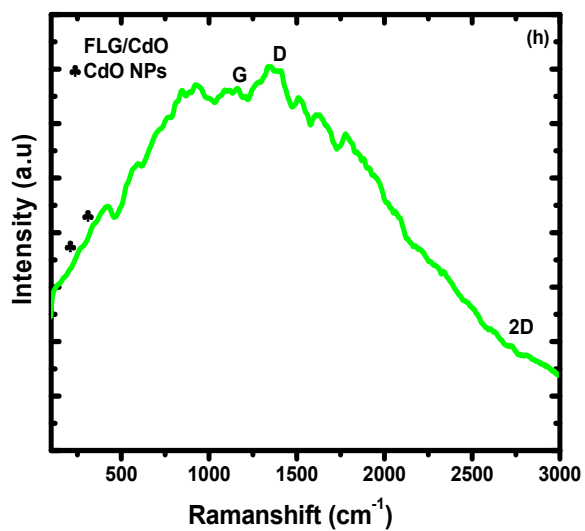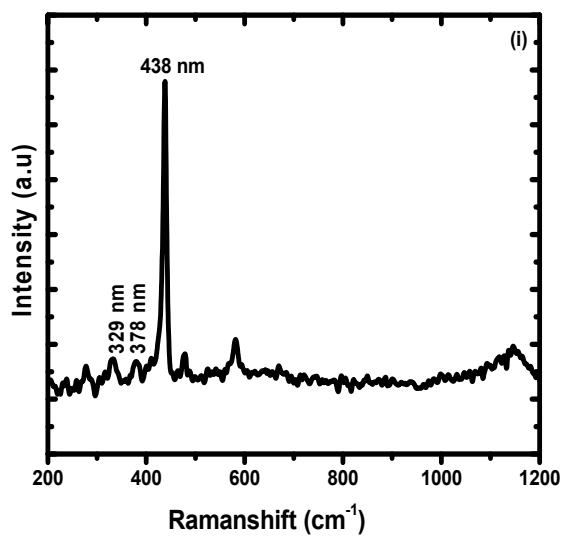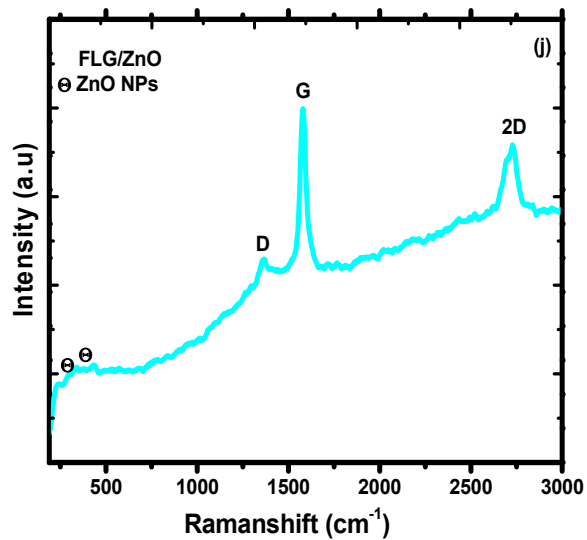

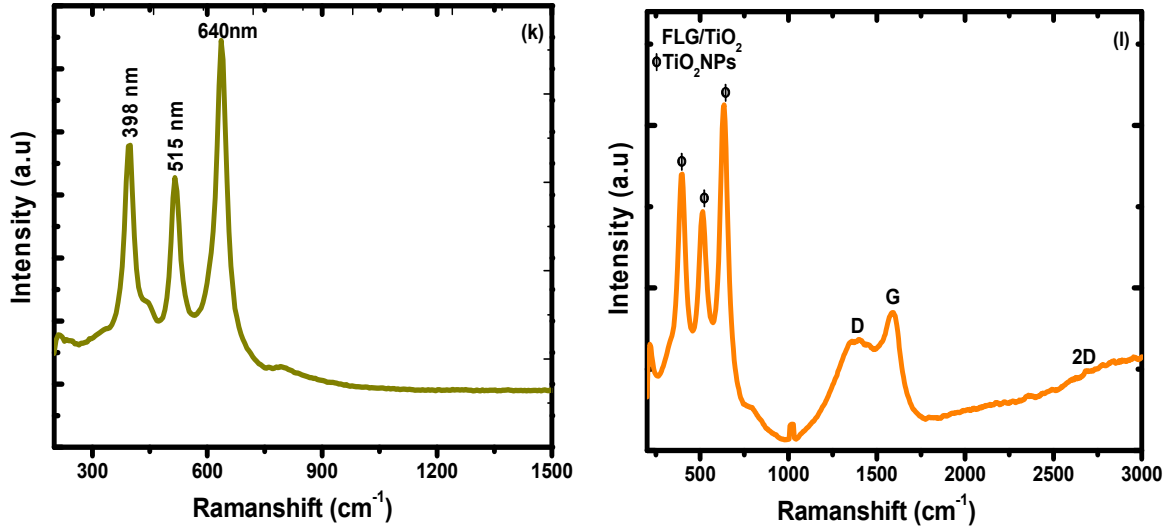

Figure S1. Raman spectroscopy of S1.(a) CeO<sub>2</sub> NPs S1.(b) FLG/CeO<sub>2</sub> S1.(c) CuO NPs, S1.(d) FLG/CuO, S1. (e) SnO<sub>2</sub> NPs, S1.(f) FLG/SnO<sub>2</sub>, S1.(g) CdO NPs S1.(h) FLG/CdO, S1.(i) ZnO NPs, S1.(j) FLG/ZnO, S1.(k) TiO<sub>2</sub> NPs, S1.(l) FLG/TiO<sub>2</sub> nanocomposites.

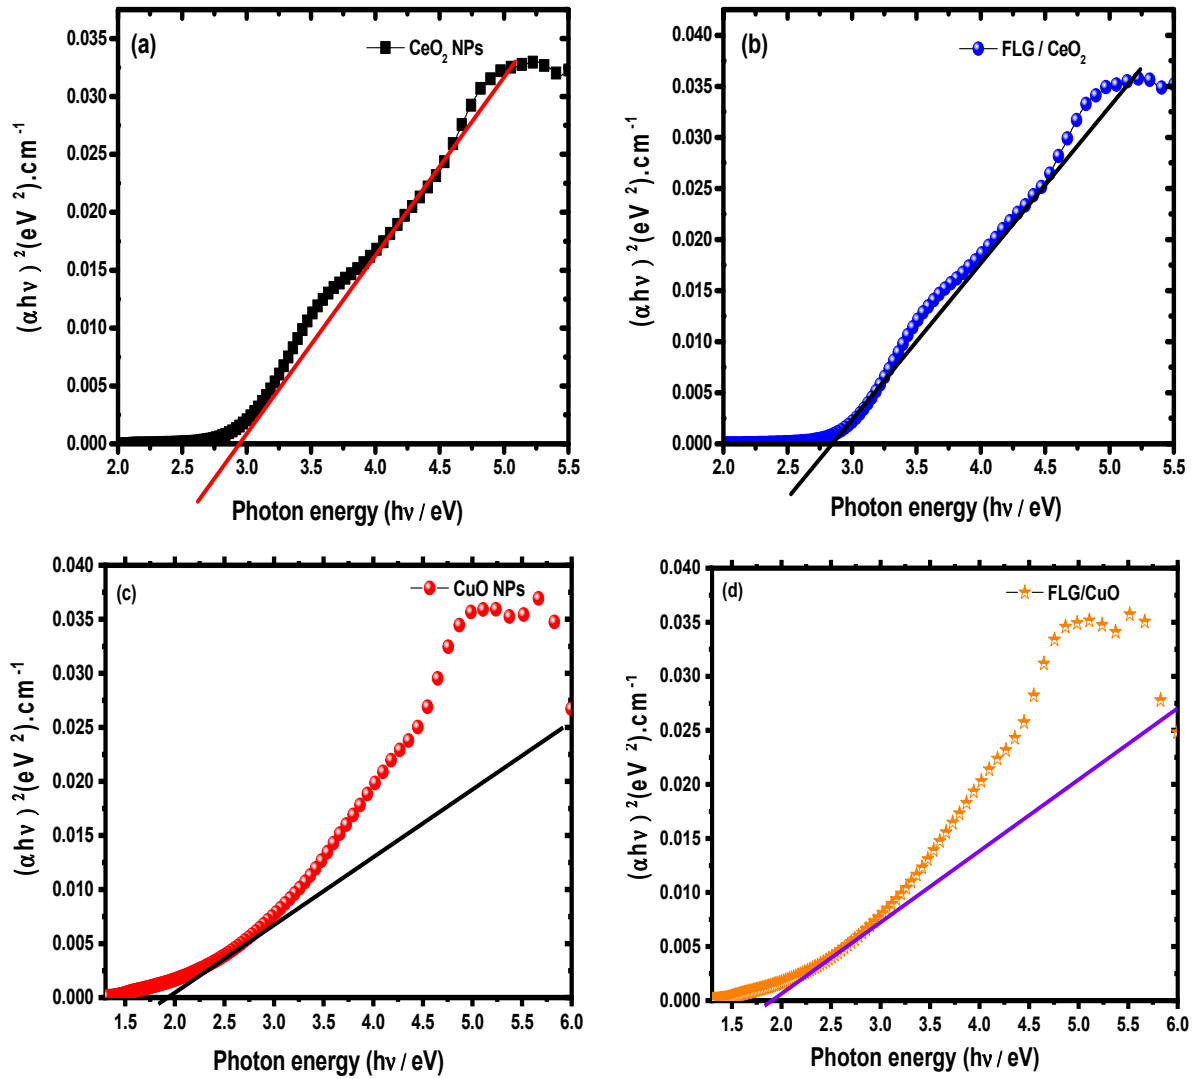

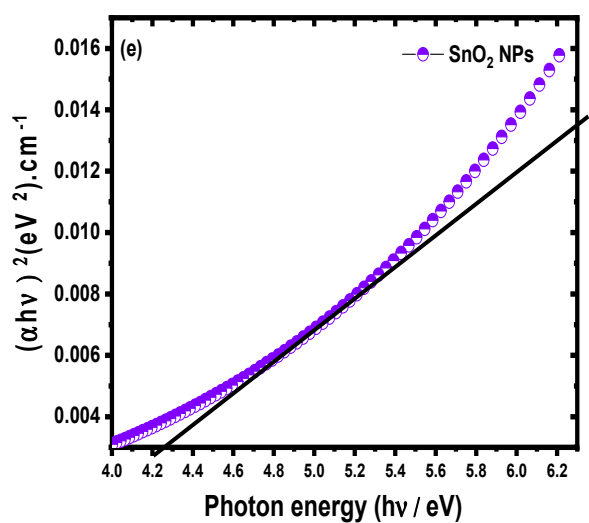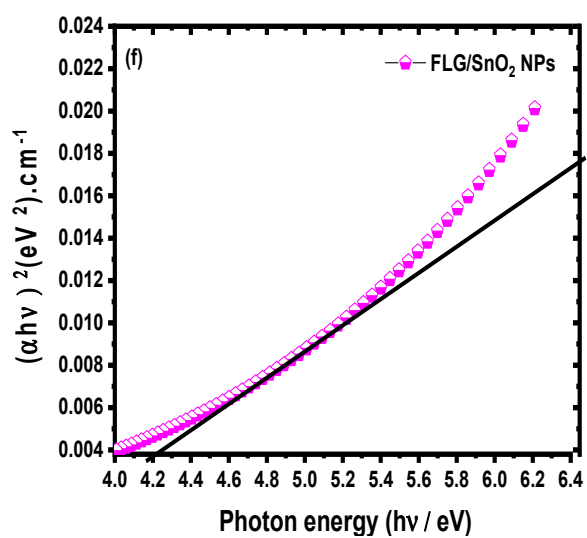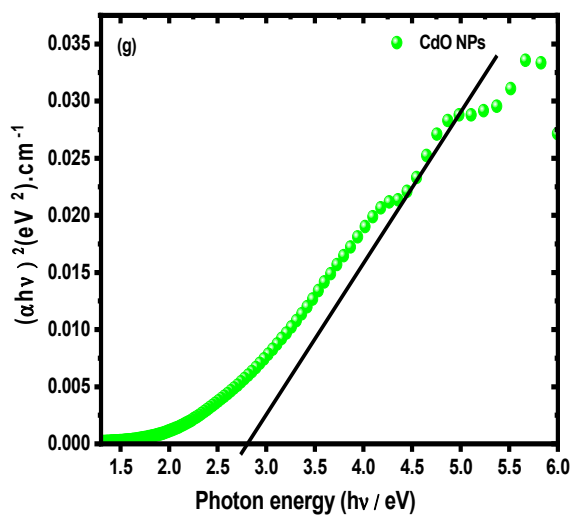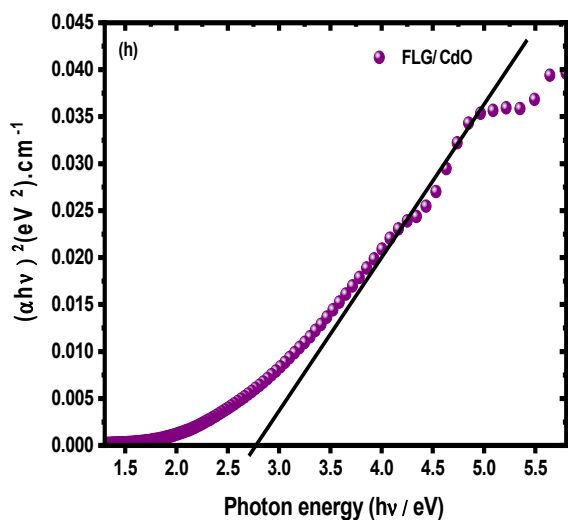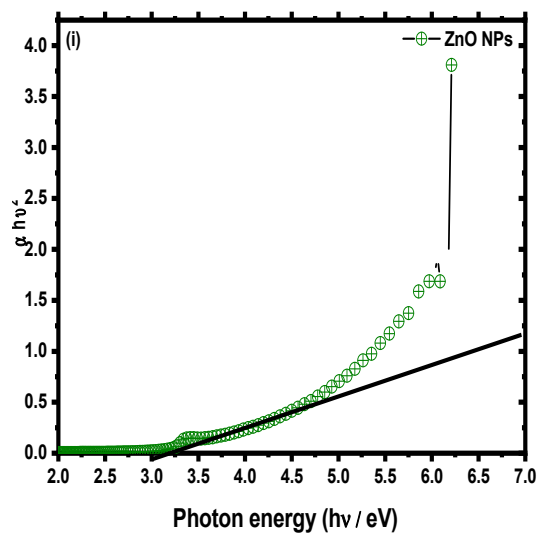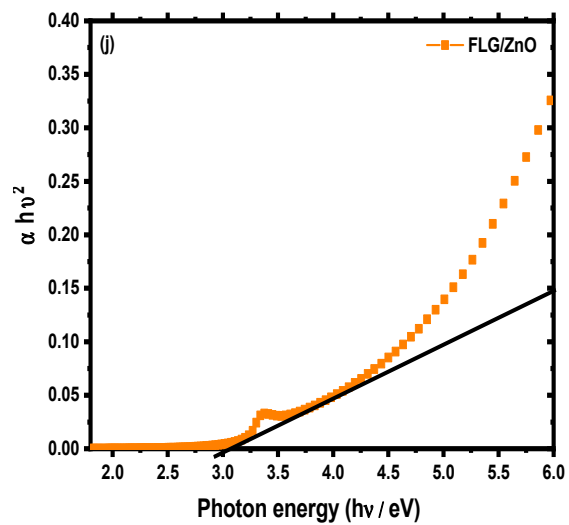

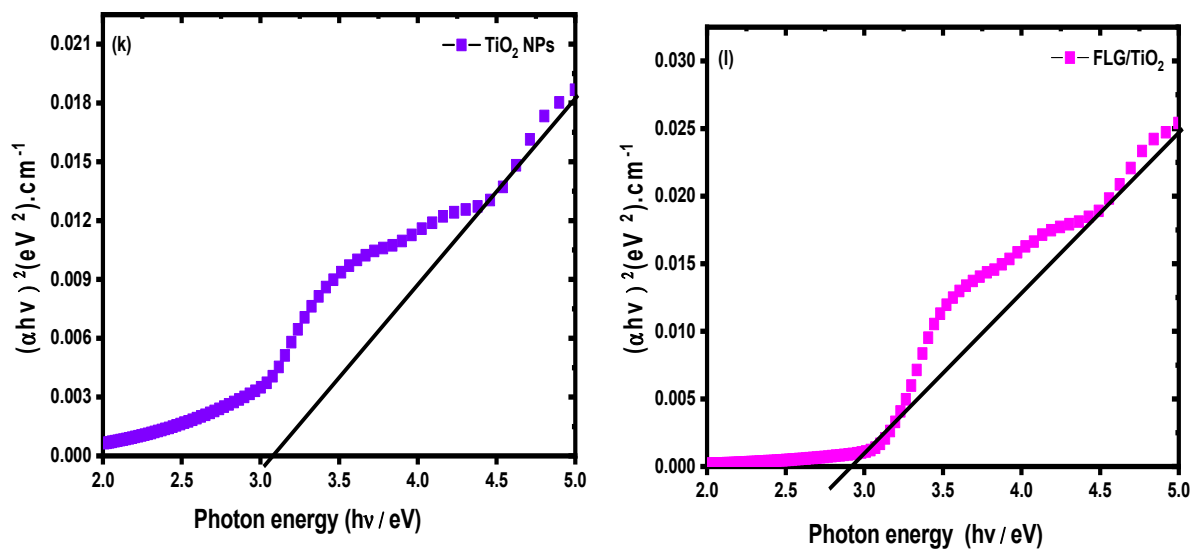

**Figure S2.** Plot of  $(\alpha h\nu)^2$  Vs energy band of S2.(a)  $\text{CeO}_2$  NPs, S2.(b) FLG/ $\text{CeO}_2$ , S2.(c)  $\text{CuO}$  NPs, S2.(d) FLG/ $\text{CuO}$ , S2.(e)  $\text{SnO}_2$  NPs, S2.(f) FLG/ $\text{SnO}_2$  S2.(g)  $\text{CdO}$  NPs, S2.(h) FLG/ $\text{CdO}$ , S2.(i)  $\text{ZnO}$  NPs, S2.(j) FLG/ $\text{ZnO}$  S2.(k)  $\text{TiO}_2$  NPs, S2.(l) FLG/ $\text{TiO}_2$  nanocomposites.
